# Supplementary material for: MicroRNA-222 reprogrammed cancer-associated fibroblasts enhance growth and metastasis of breast cancer
Source: PubMed Central journal article supplement (PMC6889135; doi:10.1038/s41416-019-0566-7), 2019-09-04
Supplement: 41416_2019_566_MOESM1_ESM.pdf [file 41416_2019_566_MOESM1_ESM.pdf]

**SUPPLEMENTARY FIGURES:**

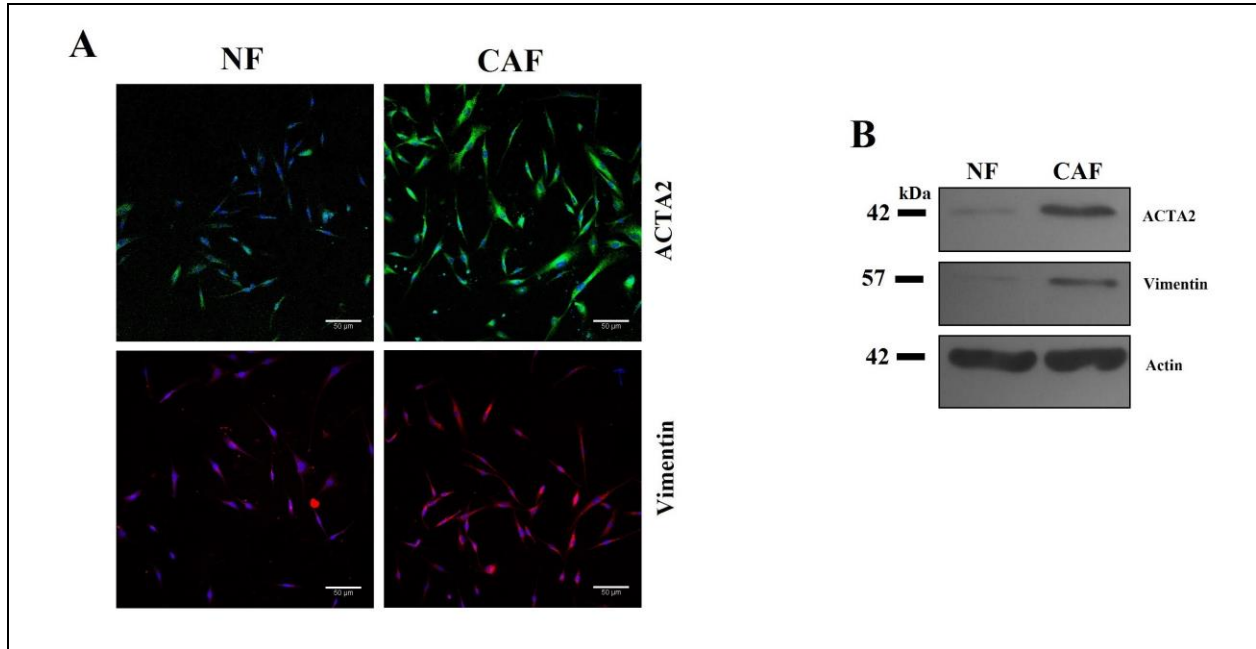

**Supplementary Figure S1:** Relative expression of the CAF marker,  $\alpha$ -SMA / ACTA2 and Vimentin was assessed in immortalized breast NFs and CAFs by (A) immunofluorescence or (B) by Western blot (using  $\beta$ -Actin as a loading control).

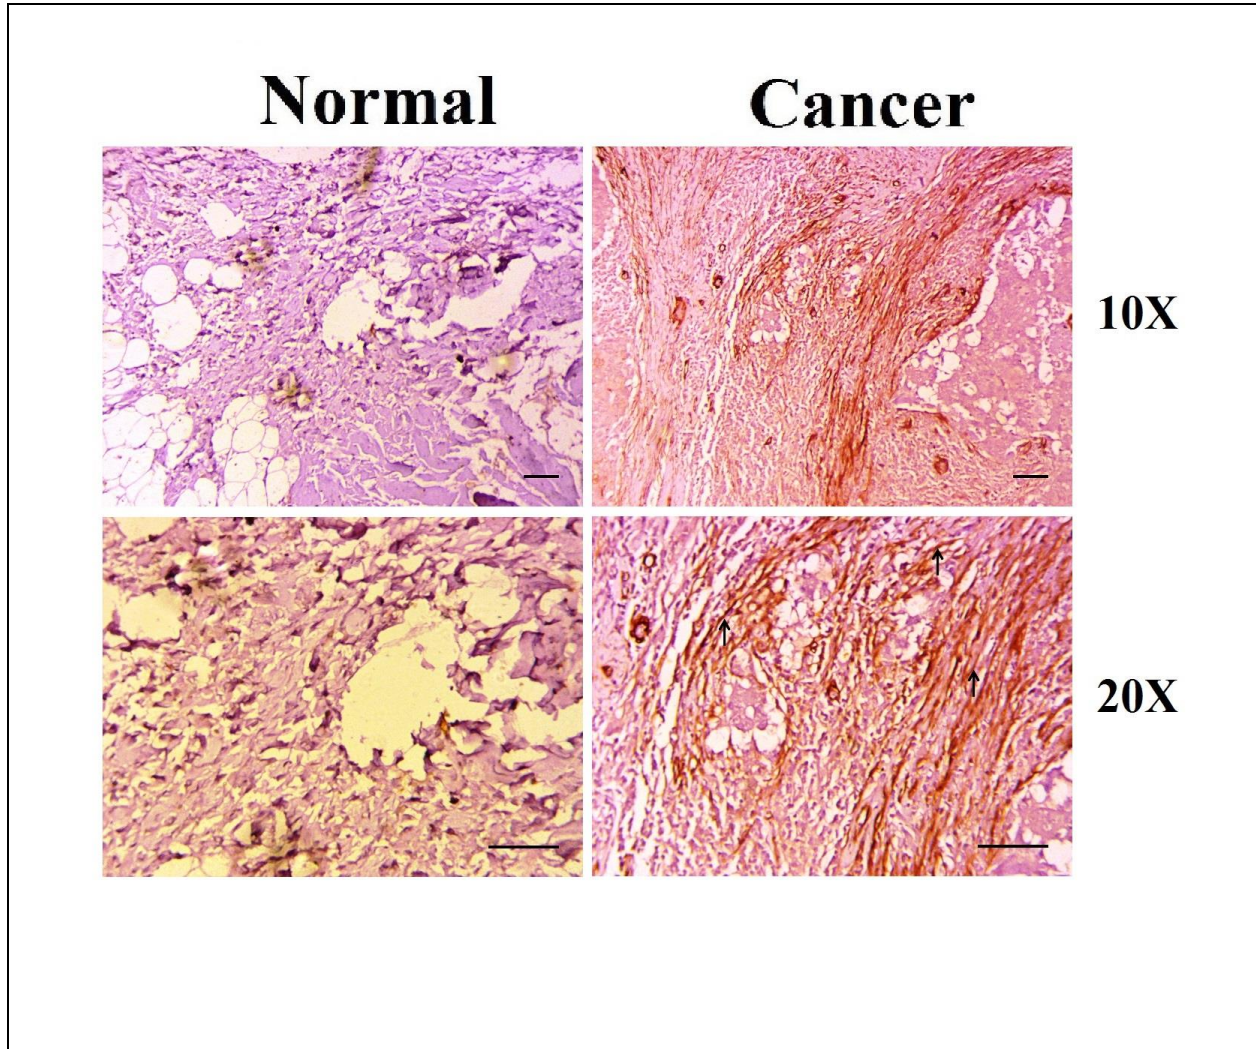

**Supplementary Figure S2:** Representative matched pair of normal and breast cancer tissues was assessed for expression of CAF marker  $\alpha$ -Sma by immunohistochemistry (10X and 20X magnification).

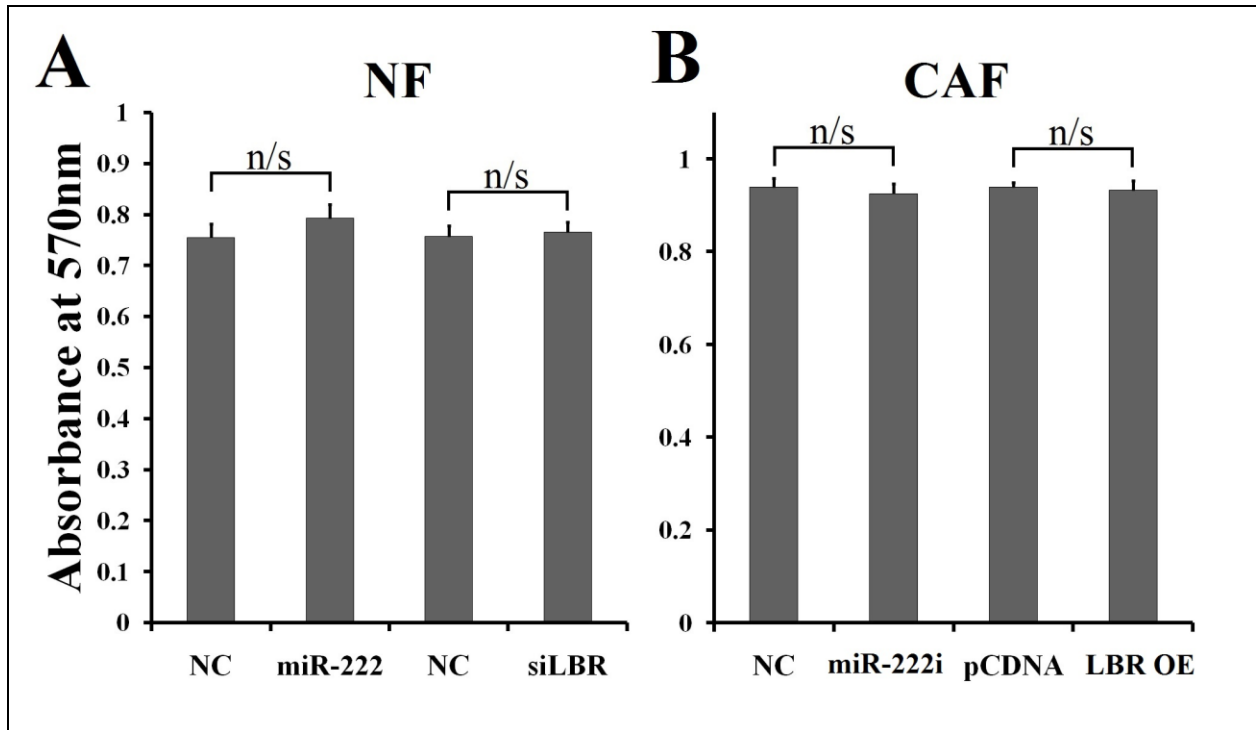

**Supplementary Figure S3:** Immortalized breast NFs (A) were transfected with miR-222 mimic or siRNA targeting LBR (siLBR) or appropriate controls (NC), and immortalized breast CAFs (B) were transfected with miR-222 inhibitor (i) or to over-express LBR (LBR OE) or with appropriate controls (NC, pCDNA). MTT assay were performed 72h post-transfection. Data represent biological triplicates.

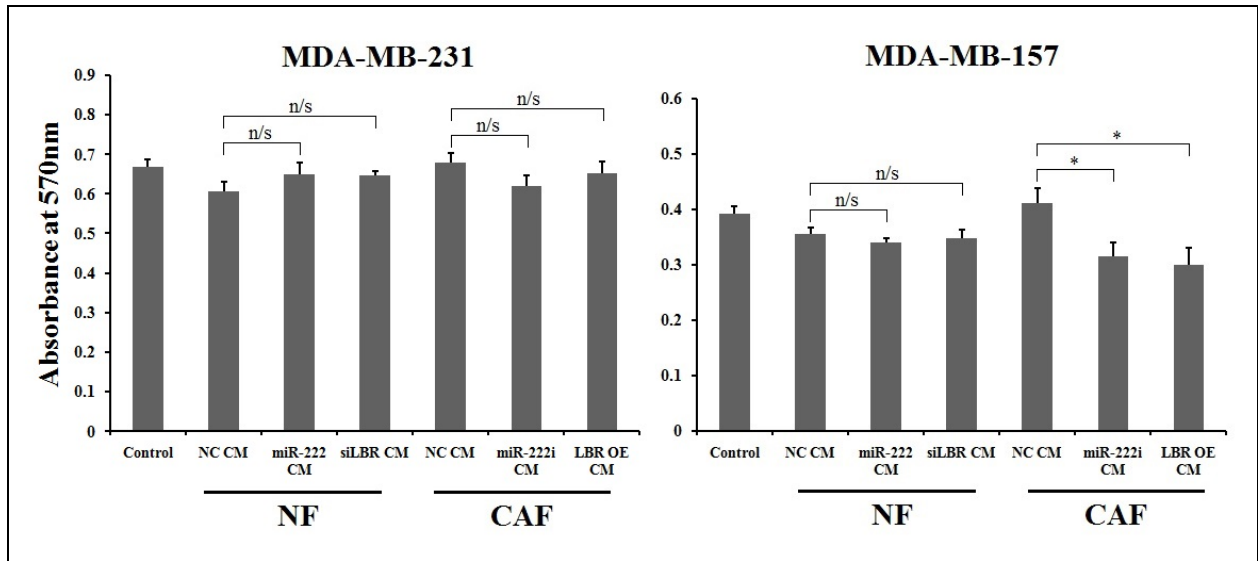

**Supplementary Figure S4:** Immortalized breast NFs were transfected with miR-222 mimic or siRNA targeting LBR (siLBR) or appropriate controls (NC), and immortalized breast CAFs were transfected with miR-222 inhibitor (i) or to over-express LBR (LBR OE) or with appropriate controls (NC). Conditioned medium (CM) was collected from fibroblast cultures and used to treat breast epithelial cancer lines MDA-MB-231 or MDA-MB-157. After that cells were seeded for the proliferation assay. Proliferation of MDA-MB-231 (Left panel) or MDA-MB-157 (Right panel) cell lines cultured with conditioned medium (CM) from the transfected fibroblasts as labelled was determined using MTT assay. Data represent biological triplicates,  $p < 0.05$  (\*).

**SUPPLEMENTARY TABLE S1(List of Primers)**

| <b>GENE</b>              | <b>FORWARD PRIMER</b>                        | <b>REVERSE PRIMER</b>                            |
|--------------------------|----------------------------------------------|--------------------------------------------------|
| ACTA2                    | GATGGTGGGAATGGGACAAA                         | GCCATGTTCTATCGGGTACTTC                           |
| 18S                      | GTAACCCGTTGAACCCATT                          | CCATCCAATCGGTAGTAGCG                             |
| IL6                      | ACCTTCCAAAGATGGCTGAA                         | CTGGCTTGTTCTCACTACTC                             |
| IL8                      | GGAACCATCTCACTGTGTGTAA                       | GGGTGGAAAGGTTTGGAGTAT                            |
| CCL2                     | AGCAGCAAGTGTCCTAAA                           | TGTGGAGTGAGTGTTCAAGTC                            |
| FSP                      | TGGATGTGATGGTGTCCACCTT                       | CTGGAAAGCAGCTTCATCTGTC                           |
| VEGF                     | CAGGACATTGCTGTGCTTTG                         | CTCAGAAGCAGGTGAGAGTAAG                           |
| OPN                      | CATATGATGGCCGAGGTGATAG                       | AGGTGATGTCCTCGTCTGTA                             |
| MMP3                     | GTGAGGACACCAGCATGAA                          | GACCACTGTCCTTTCTCCTAAC                           |
| Vimentin                 | CAGCTTTCAAGTGCCTTTCTG                        | CTTGTAGGAGTGTCGGTTGTT                            |
| Slug                     | AACTACAGCGAACTGGACAC                         | GAGGATCTCTGGTTGTGGTATG                           |
| LBR                      | CTGGCAGTGAGAACCTTTGA                         | CAGGCCAAACATGATGAGAAAC                           |
|                          |                                              |                                                  |
| LBR Cloning              | GTGGTACCACCATGCCAAGTAGGAA<br>ATTTG           | GCTCTAGAGCTTAGTAGATGTATGGAAAT<br>ATACGG          |
|                          |                                              |                                                  |
| LBR WT (Luciferase)      | AAACTAGCGGCCGCTAGTAGTTGAA<br>AATAAAATGTAGCAT | CTAGATGCTACATTTTATTTTCAACTACT<br>AGCGGCCGCTAGTTT |
| LBR Mutated (Luciferase) | AAACTAGCGGCCGCTAGTAGTTGAA<br>AATAAAATAGCGCAT | CTAGATGCGCTATTTTATTTTCAACTACT<br>AGCGGCCGCTAGTTT |
|                          |                                              |                                                  |
| miR-222                  | AGCTACATCTGGCTACTGG                          |                                                  |
